# Supplementary material for: The Impacts of Oil Palm on Recent Deforestation and Biodiversity Loss
Source: PubMed Central journal article supplement (PMC4963098; doi:10.1371/journal.pone.0159668), 2016-07-27

# Brazil

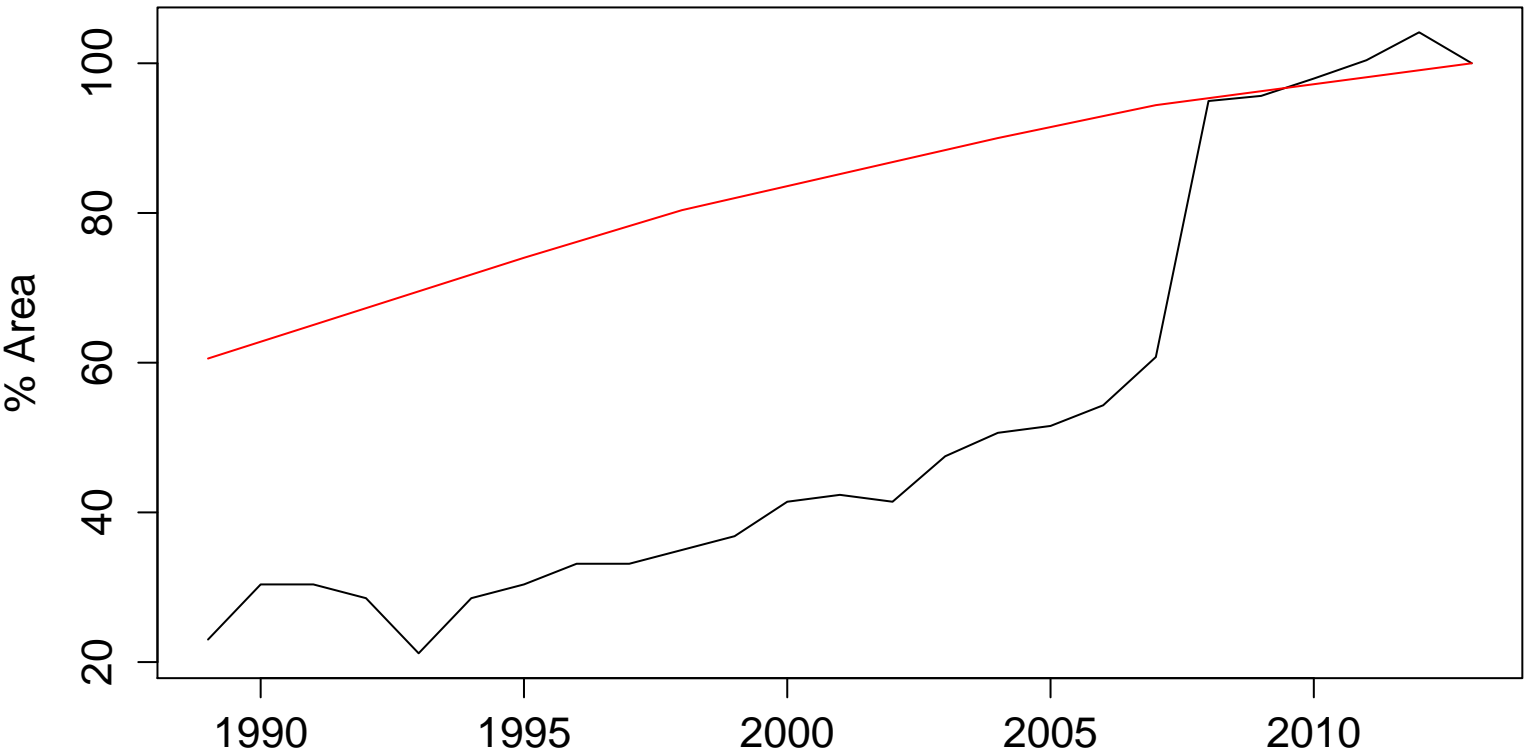

# Cameroon

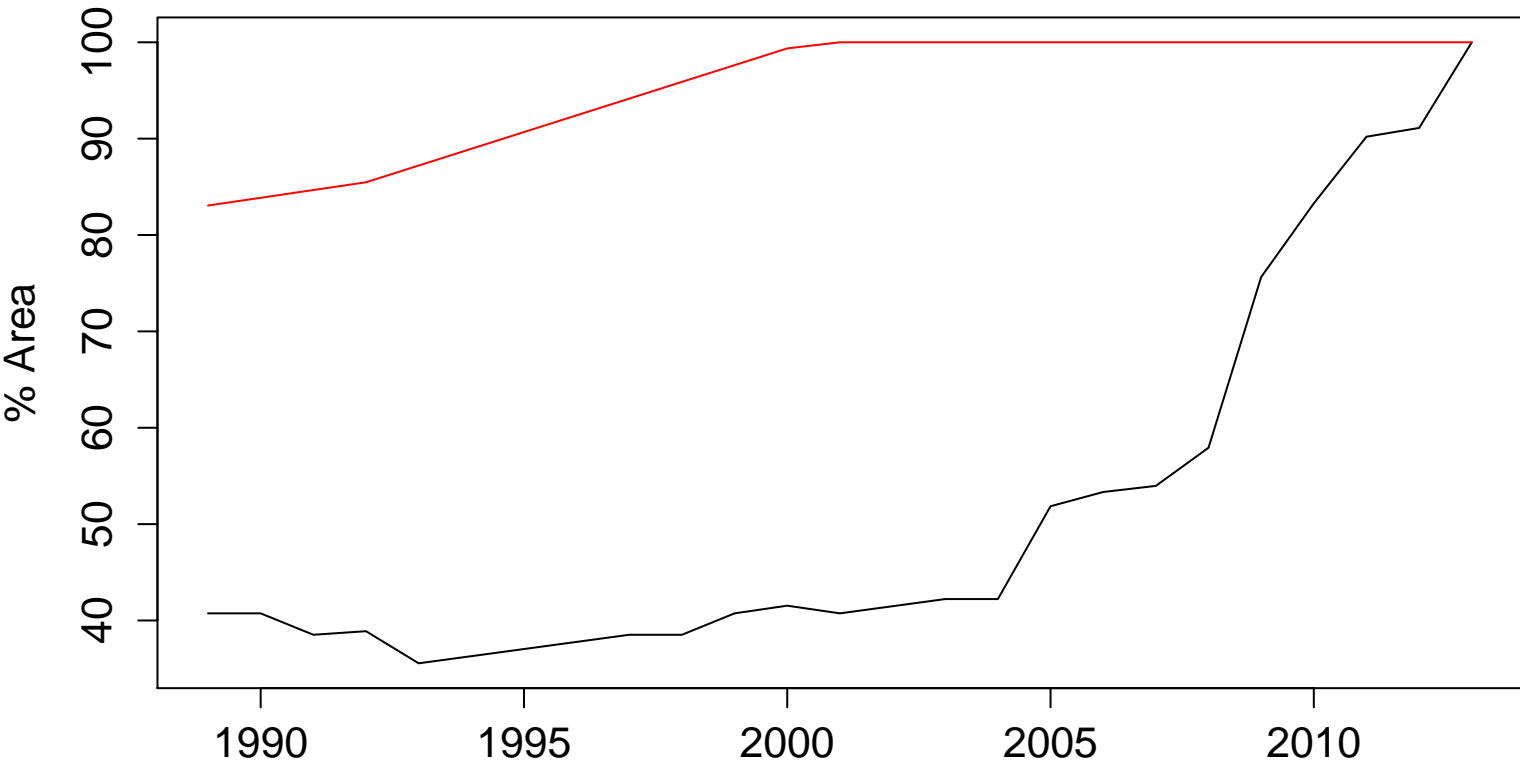

# Colombia

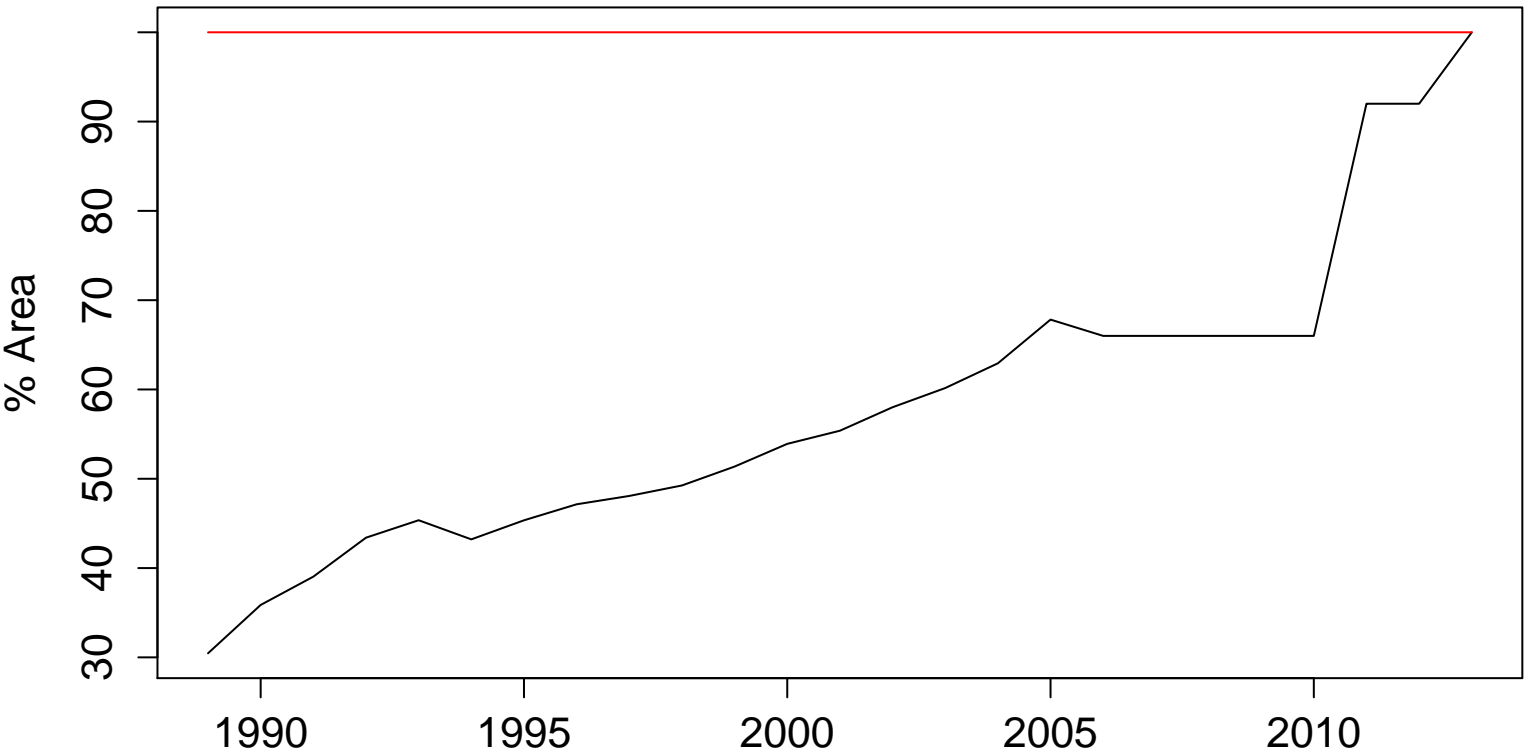

# Costa Rica

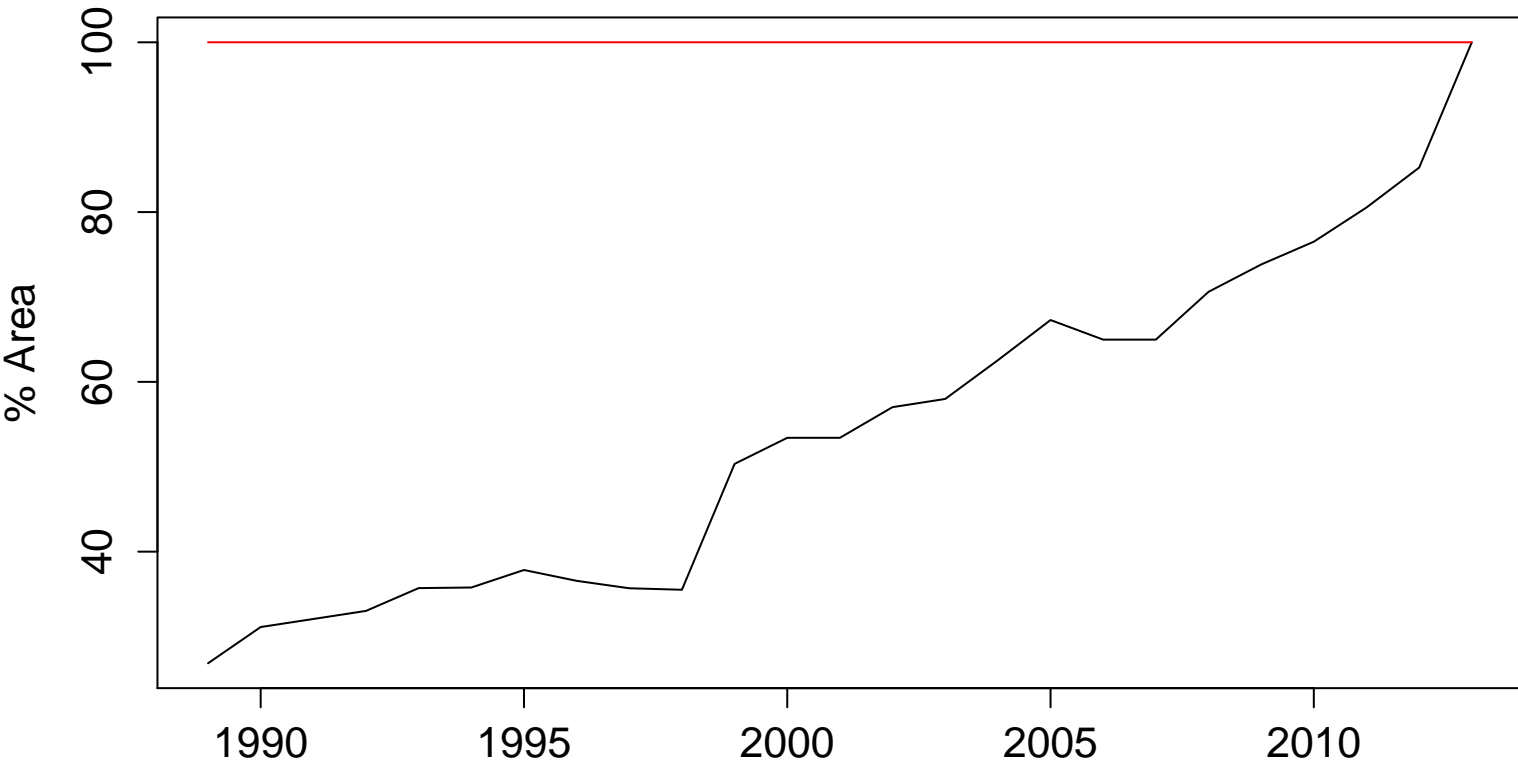

# Dominican Republic

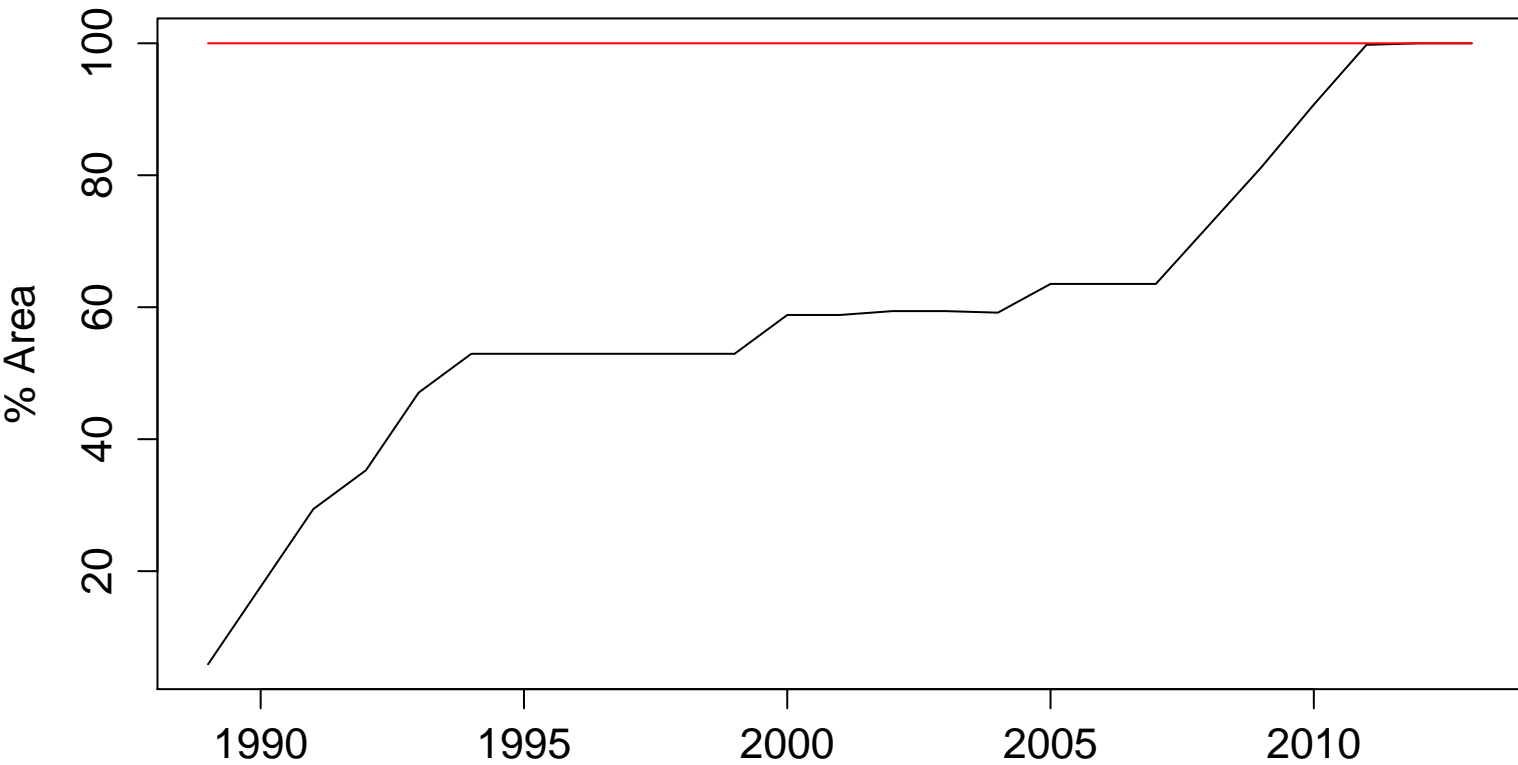

# Ghana

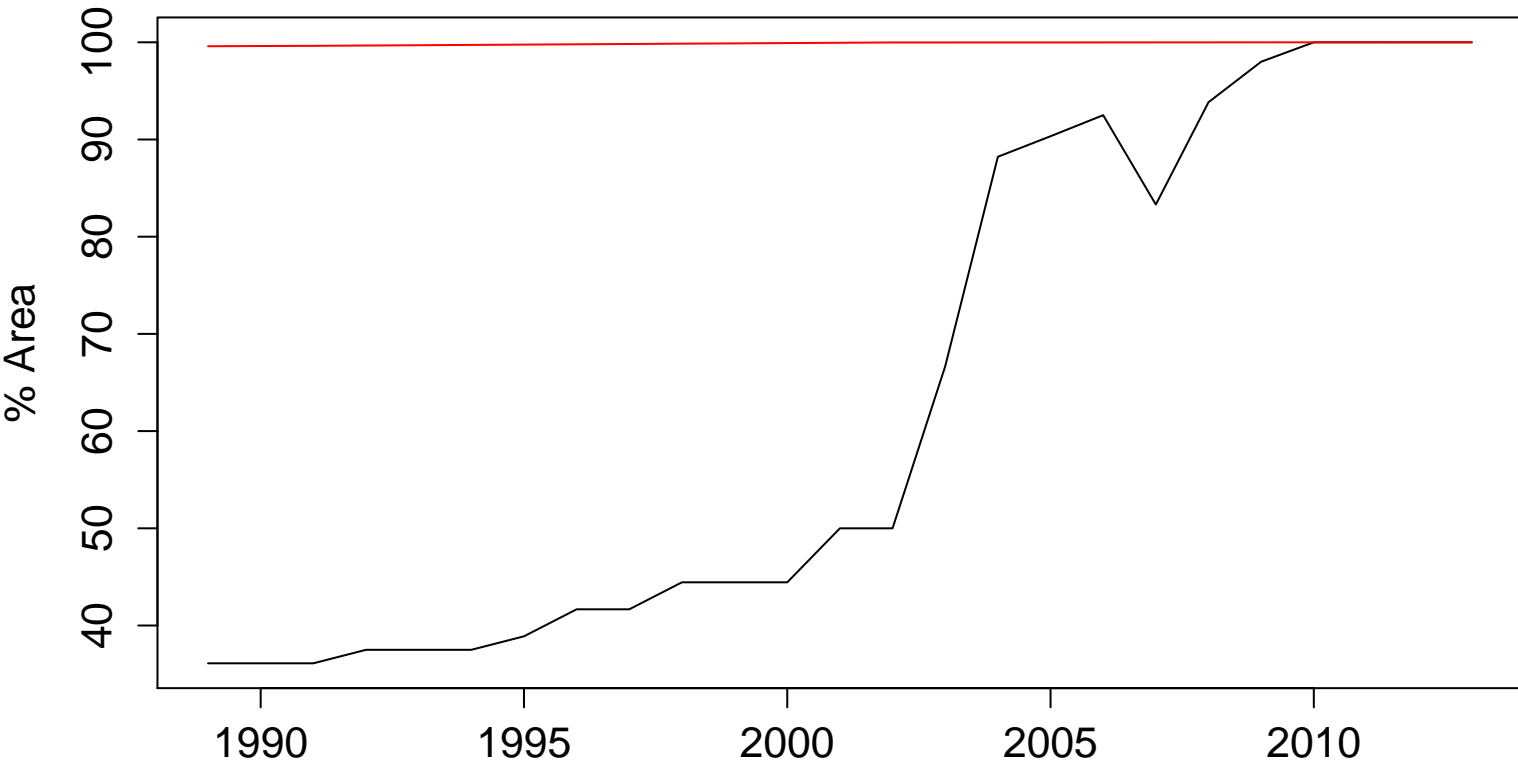

# Honduras

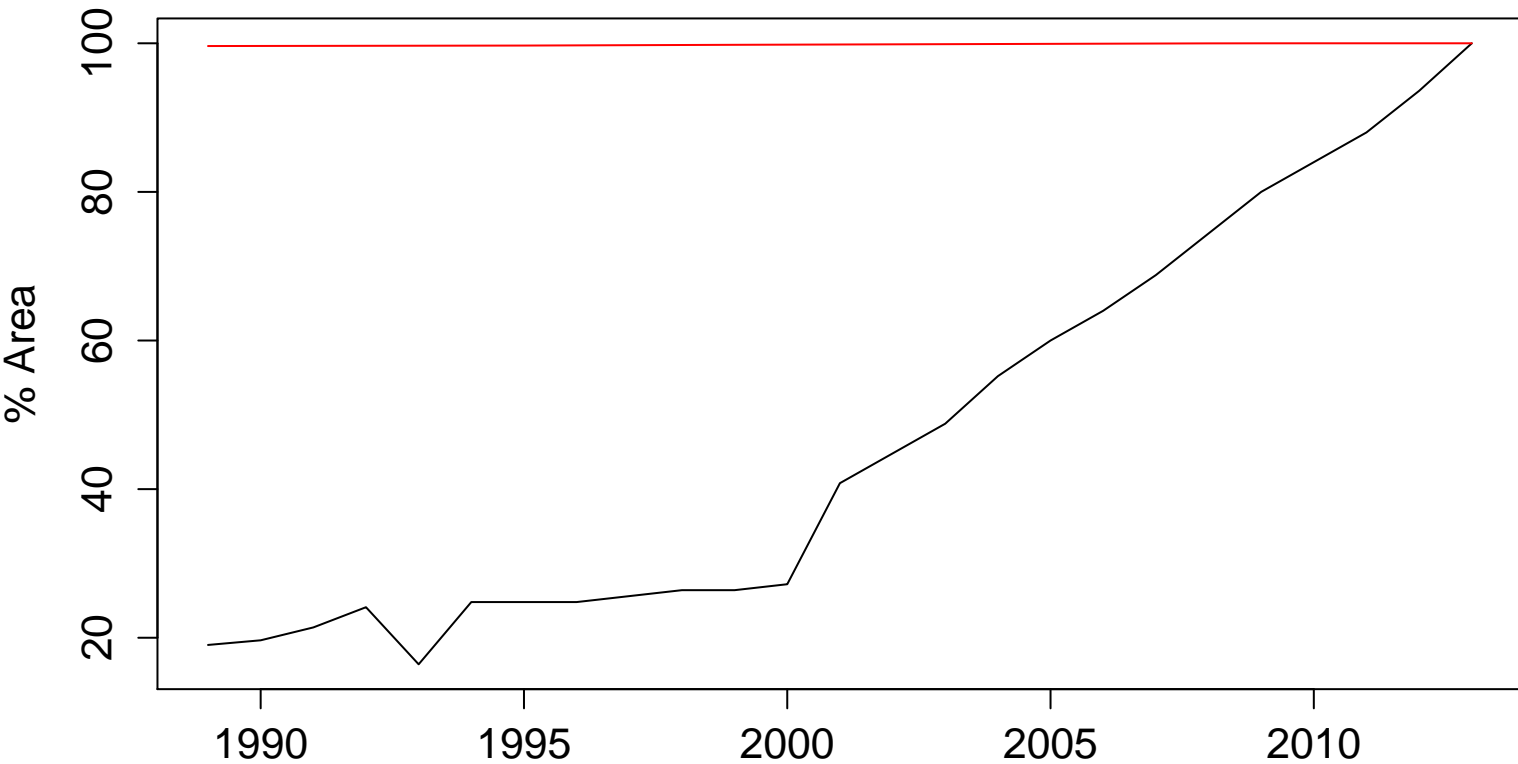

# Ivory Coast

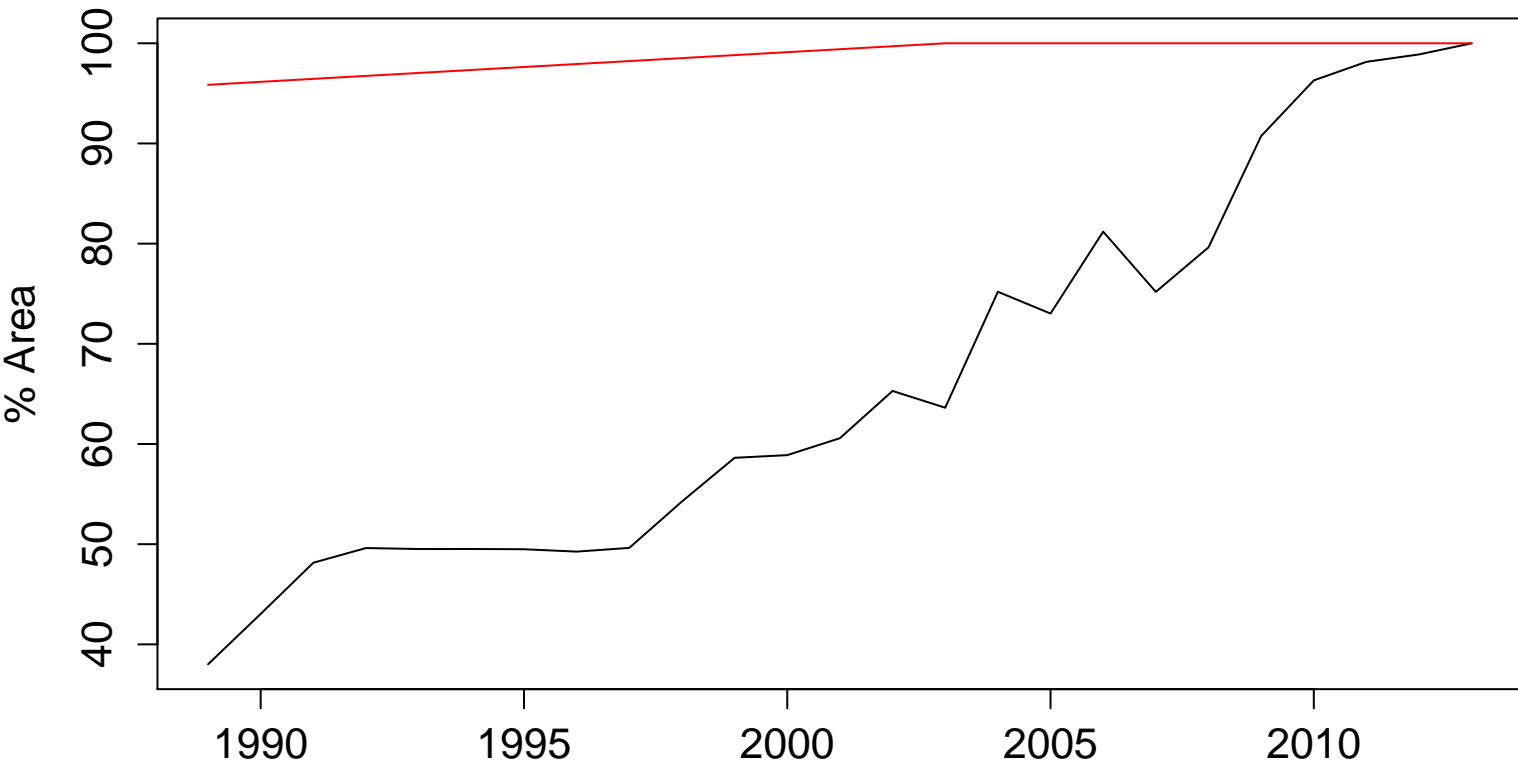



# Papua New Guinea

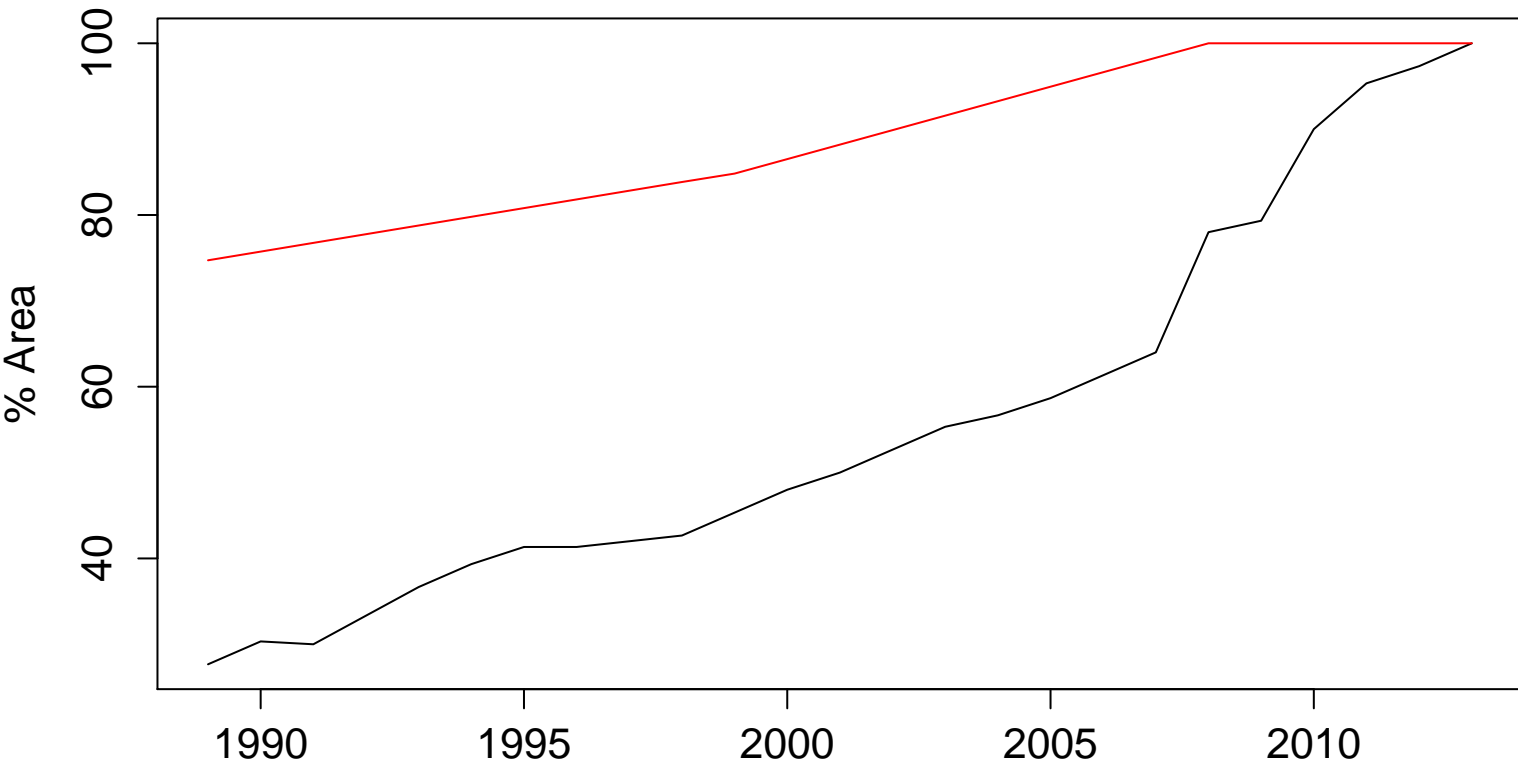

# Philippines

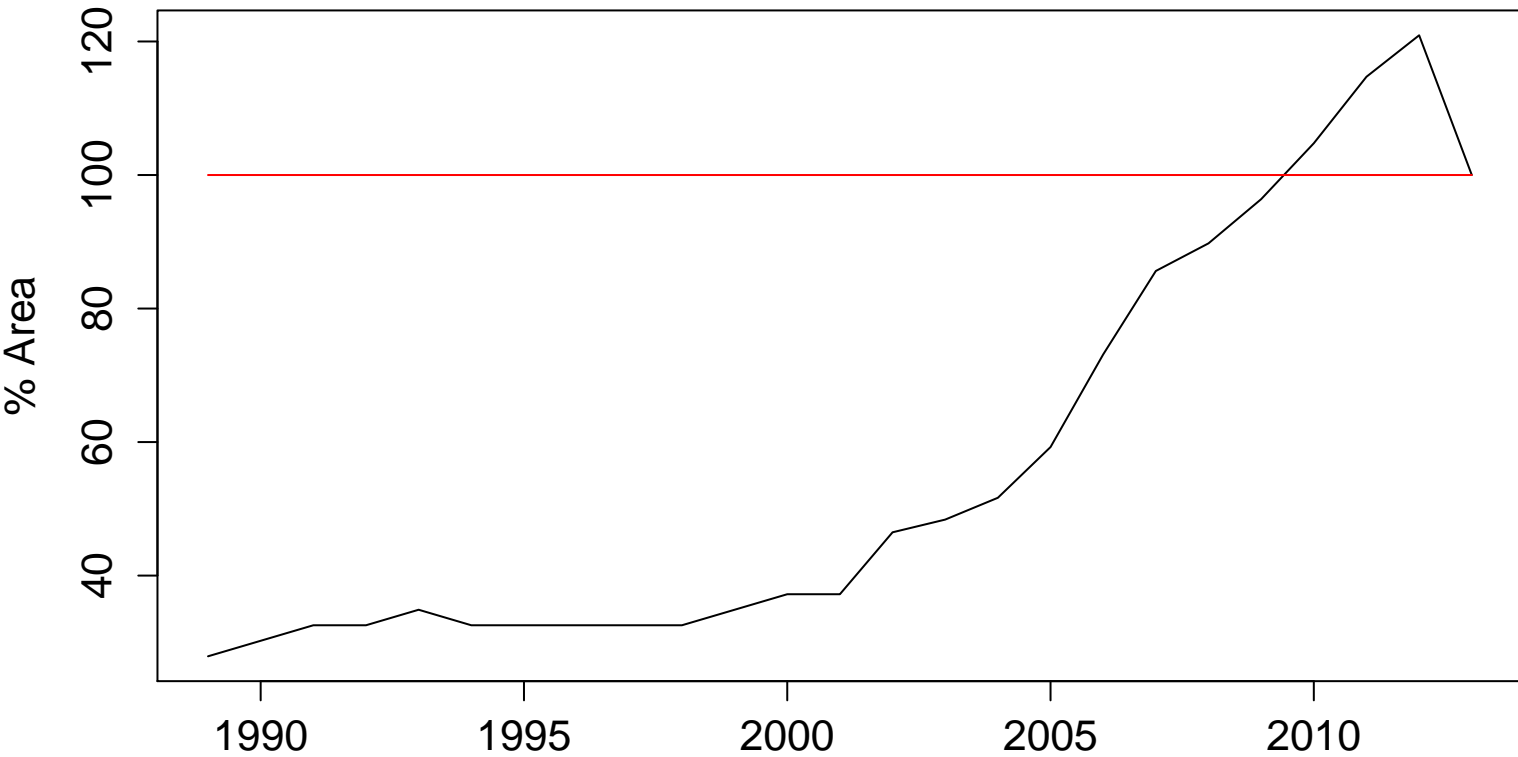

# Thailand

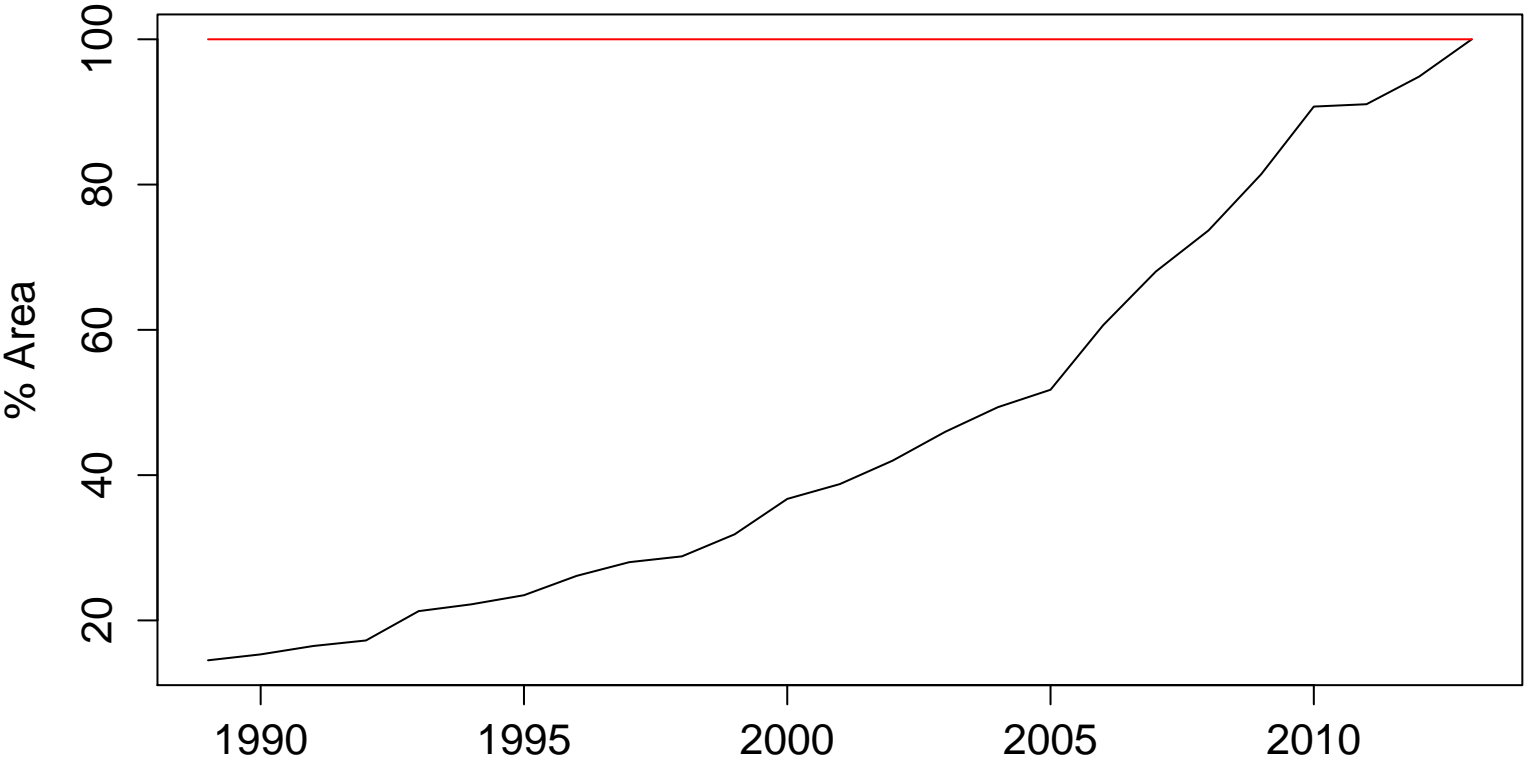

# Venezuela

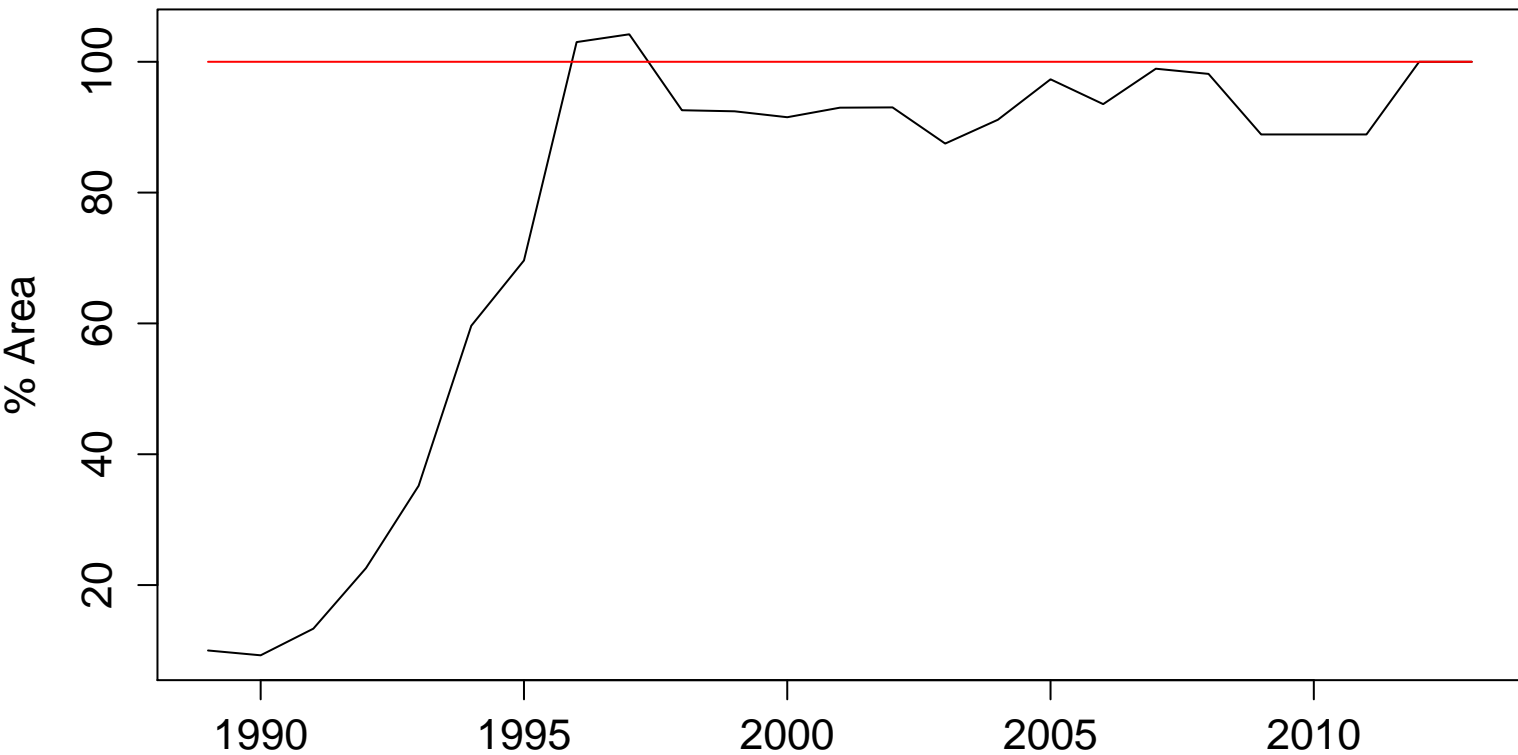

Supplement: pone.0159668.s001.pdf [file pone.0159668.s001.pdf]
